# Supplementary material for: A proof-of-concept study of cascade screening for Familial Hypercholesterolemia in the US, adapted from the Dutch model
Source: PubMed Central journal article supplement — Am J Prev Cardiol. 2021 Mar 11;6:100170. doi: 10.1016/j.ajpc.2021.100170 (PMC8315349; doi:10.1016/j.ajpc.2021.100170), 2021-03-11
Supplement: mmc1.pdf [file mmc1.pdf]

# Proband Family Screening Log

**This page for PROBANDS ONLY!**

Subject ID number

---

  
(FHFx.x)Date of counseling for family screening by FH  
Foundation

---

  
(D-M-Y)

Counseling done via which of the following

- Phone  
 Video chat  
 other

**Siblings**

How many siblings does proband have?

---

How many of these siblings have high cholesterol?

---

How many siblings had ASCVD?

---

Notes about siblings (age of onset of ASCVD, age of  
death, cause of death, etc)

---

**Parents**

Is father still alive?

- Yes  
 No

Does/did father have high cholesterol?

- Yes  
 No  
 Unknown/Not sure

Does/did father have ASCVD?

- Yes  
 No  
 Unknown/Not sure

If father had ASCVD, what was the age of onset?

---

If father is not alive, what was age at death?

---

If father not alive, what was cause of death?

\_\_\_\_\_

Is mother still alive?

- Yes  
 No

Does/did mother have high cholesterol?

- Yes  
 No  
 Unknown/Not sure

Does/did mother have ASCVD?

- Yes  
 No  
 Unknown/Not sure

If mother had ASCVD, what was the age of onset?

\_\_\_\_\_

If mother is not alive, what was age at death?

\_\_\_\_\_

If mother not alive, what was cause of death?

\_\_\_\_\_

Notes about parents

\_\_\_\_\_

## Children

How many children does the proband have?

\_\_\_\_\_

Notes about children (any known to have high cholesterol? genetically tested? any with ASCVD? death?)

\_\_\_\_\_

## Total relatives and history of FH screening

How many total LIVING first degree relatives does the proband have (parents, siblings, children)?

\_\_\_\_\_

Of these relatives, how many have already been screened for FH with LIPID MEASUREMENT?

\_\_\_\_\_

Of these relatives, how many have already been screened for FH with GENETICS?

\_\_\_\_\_

Of relatives who still need screening (either by lipid measurement or genetics), how many does the proband believe will agree?

\_\_\_\_\_

After asking relatives, how many agreed to participate?

\_\_\_\_\_

---

After asking relatives, how many DID NOT agree to participate?

---

---

Reasons why relatives DID NOT agree to participate?

---

---

Reasons proband did not invite relatives

- Not geographically close
- Not emotionally/socially close
- They are too young/don't think they would understand
- Do not want to negatively impact our relationship
- Feel guilty about their cholesterol
- My high cholesterol does not influence their health
- Don't want to worry them
- Other

---

Explain other

---

---

Recruitment, family ascertainment, misc notes

---

---

Notes about barriers to family screening

---
